# Supplementary material for: Simulations of spaceborne multiwavelength lidar measurements and retrievals of aerosol microphysics
Source: Copernicus journal article supplement (doi:10.5194/amt-2016-174), 2016-06-07
Supplement: Supplementary file [file amt-2016-174-AC1-supplement.zip]

# Simulations of spaceborne multiwavelength lidar measurements and retrievals of aerosol microphysics

David N. Whiteman<sup>1</sup>, Daniel Perez-Ramirez<sup>2</sup>, Igor Veselovskii<sup>3</sup>, Peter Colarco<sup>1</sup>, Virginie Buchard<sup>4</sup>,

<sup>1</sup>NASA/Goddard Space Flight Center, Greenbelt, MD, 20770, USA

5 <sup>2</sup>University of Granada, Spain

<sup>3</sup>University of Maryland, Baltimore County, Baltimore, MD, 21550 USA

<sup>4</sup>GESTAR/Universities Space Research Association, Columbia, MD, USA

*Correspondence to:* David N. Whiteman (david.n.whiteman@nasa.gov)

**Abstract.** In support of the Aerosol, Clouds, Ecosystems missions, simulations of a spaceborne multiwavelength lidar are performed based on global model simulations of the atmosphere along a satellite orbit track. The yield for aerosol microphysical inversions is quantified and comparisons are made between the aerosol microphysics inherent in the global model and those inverted from both the model's optical data and the simulated three backscatter and two extinction lidar measurements, which are based on the model's optical data. We find that yield can be significantly increased if inversions based on a reduced optical dataset of three backscatter and one extinction are acceptable. In general, retrieval performance is better for cases where the aerosol fine mode dominates. Lack of sensitivity to coarse mode cases is found, in agreement with earlier studies. Surface area is generally the most robustly retrieved quantity. The work here points toward the need for ancillary data to aid in the constraints of the lidar inversions and also for the need for joint inversions involving lidar and polarimeter measurements.

## 1 Introduction

20 NASA's involvement in space lidar systems dates from the Apollo era when a laser altimeter was flown on Apollo 15, 16 and 17 in 1971-72 ([http://www.lpi.usra.edu/lunar/missions/apollo/apollo\\_17/experiments/la/](http://www.lpi.usra.edu/lunar/missions/apollo/apollo_17/experiments/la/)). Since that time, several NASA missions have used laser altimeters for topographic measurements of both the Earth (Garvin et al., 1998) and other planets (Smith et al., 2001). The first NASA lidar mission that measured the Earth's atmospheric profiles was the Lidar In space Technology Experiment (LITE) that flew on board the space shuttle Discovery in 1994 for a 10-day technology demonstration mission (McCormick et al, 1993). In 2006, the Cloud-Aerosol Lidar with Orthogonal Polarization (CALIOP) lidar was launched as part of the Cloud-Aerosol Lidar and Infrared Pathfinder Satellite Observation (CALIPSO) mission and continues to make profile measurements of aerosols and clouds into 2016.

30 A future NASA atmospheric profiling mission, the Aerosol, Cloud, Ecosystems (ACE) Mission, was identified as a priority in the 2007 National Research Council Decadal Survey and is anticipated to include NASA's most advanced spaceborne lidar system. The goals of the ACE mission include decreasing the uncertainties associated with the roles of aerosols, clouds and precipitation in the hydrological cycle and climate change. The candidate suite of instruments proposed for the mission includes polarimeter, radar, multiwavelength (MW) High Spectral Resolution Lidar (HSRL) and ocean color spectrometer.

35 NASA is conducting a pre-formulation study to consider science measurement requirements and measurement capabilities of the candidate instrumentation. As a part of that pre-formulation study, we consider here the measurement capability of, and aerosol micro-physical retrievals from, a spaceborne, multiwavelength lidar within the context of the ACE mission. More information on the ACE mission along with the results of community workshops led by the ACE Science Working group can be found at <http://dsm.gsfc.nasa.gov/ace/>.

## 2 Aerosol microphysical retrievals using the multiwavelength lidar

40 The multiwavelength lidar technique has proven useful for estimating the vertical profile of aerosol microphysical parameters such as effective radius, volume and refractive index under widely varying conditions (Veselovskii et al., 2009, Ansmann et al., 2011, Müller et al., 2013, Veselovskii et al., 2015). The most common configuration of multiwavelength lidar for such studies is one based on a tripled Nd:YAG laser providing three backscattering and two extinction coefficients (the so called  $3\beta+2\alpha$  dataset). From these data aerosol microphysics can be inverted (Müller et al., 1999 a, b, Veselovskii et al., 2002, Böckmann et al., 2005) using different inversion approaches (Donovan and Carswell, 1997, Veselovskii et al., 45 2012). It is most common for ground-based systems that Raman scattering is used for the measurements from which aerosol extinction is calculated. However, for spaceborne configurations the HSRL technique (Shipley et al., 1983, Rogers et al., 2009, Burton et al, 2014) will be considered in the simulations done here due to its much higher signal-to-noise for the pure molecular measurements. An important consideration in these lidar inversions is that there are only 5 input optical data and, thus, the inverse problem is under-determined (Veselovskii et al., 2005). The inverse equations are multi-valued implying 50 that other information is needed to constrain the region over which a solution is sought. Such constraints increase the stability and accuracy of the inversion and need to be considered an important part of the solution technique. In the context of the ACE mission, additional information from a polarimeter or from lidar depolarization measurements (Burton et al., 2012) can also aid the lidar inversion by helping to constrain the search space for a solution although those details were not considered here. Additional assumptions about size- and spectrally-independent refractive index are also made in these 55 retrievals (Müller et al., 1999 a,b; Veselovskii et al., 2002).

## 3 Hardware configuration

The main purpose of this effort was to perform a relatively simple study to assess the measurements and aerosol microphysical inversions from a spaceborne multiwavelength HSRL lidar. As such, we did not wish to consider the specific detailed optical design of any particular system that might be under development to meet the needs of the ACE mission. We 60 also did not consider clouds. We focused only on the lidar system parameters that determine optical throughput and used them to simulate performance of the spaceborne lidar in a cloud-free atmosphere. To determine the system parameters, we consulted with various manufacturers and lidar specialists to generate the set of parameters shown in Table 1. These parameters are considered to be technically feasible and a reasonable representation of a currently feasible spaceborne HSRL lidar.

## 65 4 Simulation Approach

The model used in this simulation study is one that was first developed in 1999 (Whiteman et al., 2001) in support of the Raman Airborne Spectroscopic Lidar (Whiteman et al, 2007) development effort that was funded by NASA's Instrument

Incubator Program. That model has been used to simulate both airborne and ground-based lidar systems under a wide range of conditions (Whiteman et al., 2010) and is an implementation of the lidar equation (Measures, 1984) that carries physical units through the entire simulation chain including for background skylight. Modifications were made to the molecular cross sections used in the model to permit the simulation of the molecular channels of an HSRL instrument. For all simulated lidar signals, the model generates a profile of photon count rate based on the lidar instrument parameters and the atmospheric profile of aerosol and molecular density provided to the model. For validation of the model, consideration was given to using data from the CALIPSO (Winker et al., 2010) instrument. The CALIPSO lidar uses a 22-bit analog data acquisition system with gain switching capability so that the raw output is in digital count values that correlate to a voltage scale. To avoid the complications of converting this voltage value to photon count rate, we chose instead to use Geosciences Laser Altimetry System (GLAS) (Spinhirne et al., 2005) data from October 9, 2003 since the GLAS system used photon counting electronics. The measured photon count rate from GLAS could, therefore, be directly compared with the lidar simulator's output. Using GLAS instrument parameters, the comparisons of GLAS data with the model output were in excellent agreement including during the passage of the instrument into and out of the terminator region where skylight background is considerable. Beyond a photon count rate of 10-20 Mhz, however, the comparisons degraded due to the non-linear nature of the photon counting process of the GLAS electronics. This limitation did not influence the comparisons done here since the candidate ACE lidar is considered to use an analog detection system which does not possess the non-linear behavior shown in the GLAS photon counting data.

As the basis for the simulations, the Goddard Earth Observing System Model, Version 5 (GEOS-5, Rienecker et al. 2008) was used to simulate the atmospheric conditions along a 24-hr track of the CALIPSO lidar instrument valid for July 24, 2009. GEOS-5 is an Earth system model, here incorporating an atmospheric general circulation model, representations of atmospheric physics including moist processes, chemistry, and aerosols, and a data assimilation module. The GEOS-5 simulation was run using assimilated meteorology from its own Modern-Era Retrospective Analysis for Research and Applications (MERRA, Rienecker et al. 2011). Aerosols were run inline and radiatively coupled in GEOS-5 using a version of the Goddard Chemistry, Aerosol, Radiation, and Transport (GOCART) module (based on Chin et al. 2002). The GOCART module includes representations of dust, sea salt, black and organic carbon, and sulfate aerosols. Sulfate and carbonaceous species are carried as bulk mass tracers with additional partitioning between hydrophobic and hydrophilic modes for the carbonaceous aerosols. Sulfate and carbonaceous aerosols are all assumed to be in the fine mode. Sea salt and dust are each represented by a series of five size bins spanning 0.1 – 10 microns radius for dust and 0.03 – 10 microns dry radius for sea salt, allowing for simulation of both the fine and coarse fractions of each. A more complete description of how GOCART is implemented in the GEOS models is provided in Colarco et al. (2010), which also includes a detailed evaluation of the module with respect to MODIS, MISR, and AERONET aerosol optical depth (AOD) observations. Additionally, Colarco et al. (2010) evaluated the Angstrom parameter (i.e., spectral dependence of AOD, which is related to particle size) with respect to AERONET observations, finding a high degree of correlation with the observations but a low bias in the model (i.e., the model tended toward a small overestimate of the coarse mode contribution to the AOD). Optical properties of the aerosols are primarily based on Mie calculations using the particle properties as in Colarco et al. (2010) and Chin et al. (2002) with spectral refractive indices primarily from the Optical Properties of Aerosols and Clouds (OPAC, Hess et al. 1998) database. The exception to this is for dust, updated since Colarco et al. (2010), for which non-spherical optical properties are derived from an offline database (Meng et al. 2010) following the methodology in Colarco et al. (2014b).

The specific version of GEOS-5 used in this study additionally includes assimilation of MODIS-derived AOT over ocean and dark land surfaces. This is the so-called MERRAero aerosol reanalysis (Kessner et al. 2013; Buchard et al. 2014, 2015, 2016; Colarco et al. 2014a). Emissions for anthropogenic species are primarily from the AeroCom Phase 2 emission

inventories (<http://aerocom.met.no/emissions.html>), except for biomass burning emissions—based on observed MODIS fire radiative power (QFED, Darmenov and da Silva, 2015)—and dust and sea salt, which are wind-speed dependent following Colarco et al. (2010). Driven by the MERRA meteorology, MERRAero was run for the period 2002 – 2015 at a global 0.5 deg x 0.625deg latitude-by-longitude horizontal resolution with 72 vertical levels extending from the surface to about 85 km. The aerosol data assimilation step, described in Buchard et al. (2015), provides a direct observational constraint on the simulated 550 nm AOD, but absorption, spectral AOD, and aerosol vertical distribution and compositional distribution remain largely driven by the background GEOS-5 simulation. Buchard et al. (2015) extensively validated the absorbing AOD with independent AERONET and OMI observations, finding generally good agreement between the model and observations, particularly for dust cases provided the dust was assumed weakly absorbing in the shortwave (subsequently adopted in a reprocessing of the MERRAero fields used here), but an underestimate in the absorption for biomass burning aerosols owing to the spectrally flat refractive indices for organic carbon in the OPAC database (not corrected for in the simulations shown here). Buchard et al. (2016) evaluated the MERRAero simulation of surface particulate matter (PM) over the United States with respect to the IMPROVE (Interagency Monitoring of Protected Visual Environments, <http://vista.cira.colostate.edu/Improve/>) and EPA observation networks, showing the positive impact of the aerosol data assimilation on the PM simulation, as well as generally good agreement with the observations especially for the rural IMPROVE network stations but a deficiency in the model owing to its present lack of nitrate aerosols. Buchard et al. (2015) also provided evaluation of the simulated vertical profile of the MERRAero aerosols against CALIPSO observations. Nowottnick et al. (2015) carried out a more detailed evaluation of the aerosol vertical profile by directly simulating the CALIPSO vertical feature mask products from the MERRAero fields; their study showed a good consistency between the simulated aerosol backscatter profiles and the CALIPSO observations, although a higher frequency of occurrence of dust layers is found in MERRAero than the CALIPSO observations would suggest.

Density and aerosol optical profiles from GEOS-5 were extracted along the CALIPSO track at a 70 km horizontal resolution and extending up to an altitude of approximately 80 km. These profiles were then used as input to the lidar simulator. The vertical resolution of the GEOS-5 profiles ranged from 0.12 km at the lowest levels of the atmosphere to approximately 4 km at the top of the profile. Scene brightness information was provided by the VLIDORT (Vector Linearized Discrete Ordinate Radiative Transfer) radiative transfer model (Spurr et al., 2006, Buchard et al., 2015). Using simulated atmospheric profiles along the CALIPSO track permits the optical measurements of the ACE candidate lidar to be compared with those of the CALIPSO lidar. Also, we were able to perform microphysical inversions using both the GEOS-5 optical data as well as the lidar simulations of the GEOS-5 optical data and compare with the aerosol microphysics inherent in the GEOS-5 model. GEOS-5 generates cloud fields but, as mentioned, they were ignored for the studies done here to simplify the assessment of basic lidar measurement capability.

A comparison of simulated ACE lidar backscatter and extinction measurements at 532 nm using the parameters listed in Table 1 (with orbital altitude of 450 km) and the GEOS-5 optical inputs is shown in Fig. 1. We chose to display the mid-visible wavelength results only to simplify the graph. The atmospheric conditions simulated by GEOS-5, and used as input to the numerical model, are those from 0102 UT on July 24, 2009 at a point over central Africa. This constitutes a nighttime simulation with the backscatter comparisons on the left and the extinction comparisons on the right. For both backscatter and extinction, the optical input data from GEOS-5 are shown (“GEOS532”) along with two simulations of the lidar measurements; the first without random uncertainty (“NoNoise”) and the second with random uncertainties consistent with the lidar system hardware and the atmospheric conditions (“Sim532”). For both backscatter and extinction, the lidar simulations without random uncertainty generally agree within 1-3% of the GEOS-5 inputs except for portions of the

150 profiles showing significant gradients where the 150 m and 450 m vertical resolution of the backscatter and extinction profiles, respectively, can lead to larger differences. This indicates that the lidar numerical simulations can faithfully reproduce the input optical data. The lidar simulations that include random uncertainty indicate that for this atmospheric profile, the simulated lidar system would measure aerosol backscatter and extinction in the boundary layer with generally less than 3% and 20% random uncertainty, respectively. Such results were found to be typical for a nighttime simulation.

155 With the lidar simulation model validated by comparison with GLAS data and shown to reliably reproduce the GEOS-5 optical inputs as shown in Fig. 1, a comparison was then made of the lidar-simulated measurements at 532 nm and the actual 532 nm CALIPSO lidar data from July 24, 2009 under both day and night conditions. Examples of such comparisons are given in Fig. 2, where daytime profiles are shown on the left and nighttime on the right. Because of the difficulty to determine photon flux from the CALIPSO data, the simulated lidar profiles were normalized in the region above the

160 boundary layer. Considering the portions of the profiles above the boundary layer, we estimate that a spaceborne lidar system with the specifications shown in Table 1 would possess a factor of approximately 3-5 higher signal to noise backscatter measurements under nighttime conditions than the CALIPSO lidar and more than an order of magnitude higher signal to noise in the daytime. The mismatch in the height of the planetary boundary layer between the lidar simulations and the actual CALIPSO lidar measurements shown is not surprising given that boundary layer height is a difficult quantity to forecast in

165 atmospheric models in general. It is particularly true for a global simulation as was used for these studies.

## 5 Inversion Schemes and Input Data Used

One of our goals was to study the inversion of simulated spaceborne multiwavelength lidar data to microphysical quantities such as effective radius, concentration (volume, surface) and index of refraction. We considered two different inversion techniques, that of regularization (Twomey, 1977, Müller et al., 1999 a,b, Veselovskii et al., 2002) and linear estimation

170 (Twomey, 1977, Donovan and Carswell, 1997, Veselovski et al., 2012, De Graaf et al., 2013). The regularization technique uses a linear combination of triangular basis functions in the inversion and, when used with  $3\beta+2\alpha$  optical input data, results in estimates of both the volumetric quantities, such as effective radius and concentration, and the particle size distribution (PSD). The inversion based on the linear estimation (LE) approach expands the solution directly in terms of the Mie kernels in order to retrieve volumetric quantities but does not provide a reasonable estimate of PSD. Previous research (Veselovskii

175 et al, 2012) indicates that reasonable estimates of volumetric quantities are achievable using the LE technique and  $3\beta+1\alpha$  optical input data. Also, the LE technique is computationally much more efficient than the regularization technique, although computations using the regularization technique can be made more efficient through the use of pre-computed tables of Mie scattering values.

In the study here, we performed inversions based both on  $3\beta+2\alpha$  input optical data as well as reduced,  $3\beta+1\alpha$  optical data

180 using both the regularization and LE techniques. For the  $3\beta+1\alpha$  studies, we removed the 355 nm extinction measurement leaving just the 532 nm extinction measurement since the 355 nm measurements are more technologically challenging and thus considered to be higher risk. Whether using regularization or LE with either 5 or 4 optical data as input, it must be remembered that the inversion problem is significantly under-determined implying that both the method of solution and the constraints used in the inversion influence the results obtained. Ancillary data that can help to decrease the ranges of allowed

185 radii and refractive index in the search for a solution can improve the solution obtained. Because of the multi-valued solution space, in either the regularization or LE approaches, a family of solutions is obtained. The final solution is determined from this family by averaging  $\sim 1\%$  of the solutions nearest to the minimum of discrepancy, where discrepancy refers to the

difference between the input optical data and the optical data consistent with the inverted microphysical parameters (Veselovskii et al., 2002).

## 190 6 Results

Here we consider what fraction of the simulated lidar measurements would be of sufficient quality to support an inversion to aerosol microphysics. We consider how the inversions of aerosol microphysics, both for the original GEOS-5 optical data and for the simulated lidar measurements, compare with the aerosol microphysics inherent in the GEOS-5 model.

### 195 6.1 Yield

According to the draft ACE report from 2010 ([http://acemission.gsfc.nasa.gov/documents/Draft\\_ACE\\_Report2010%20.pdf](http://acemission.gsfc.nasa.gov/documents/Draft_ACE_Report2010%20.pdf)), the ACE lidar data, in some cases aided by or in combination with daytime polarimeter data, will be used to retrieve vertical profiles of aerosol extinction and backscatter, effective radius and width of size distribution, refractive index, single scatter albedo and number concentration. Under nighttime conditions, only the lidar will be available to retrieve these parameters so  
200 it is important to study the ability of the lidar to perform microphysical retrievals without ancillary measurements.

The draft ACE report states that 3 backscatter and 2 extinction coefficients are needed with 15% accuracy from the multiwavelength lidar to support inversions of the lidar data to aerosol microphysical parameters. A minimum extinction threshold of  $0.02 \text{ km}^{-1}$  at 532 nm was also established to support inversions. The 15% threshold is consistent with publications that have studied the influence of various amounts of random uncertainty on the inversions (Veselovskii et al.,  
205 2012, Perez-Ramirez et al, 2013).

We would now like to calculate the “yield” of a multiwavelength lidar with the specifications shown in Table 1 and considering the minimum extinction threshold of  $0.02 \text{ km}^{-1}$  and maximum of 15% random uncertainty. To do so, we consider the 24-hr dataset from GEOS-5 and “bins” of the atmosphere measuring 450 m in the vertical dimension and 80 km horizontally. For these calculations and for later inversions, the backscatter data were summed to 450m vertical resolution to  
210 match the extinction data. If a bin has average extinction at 532 nm greater than  $0.02 \text{ km}^{-1}$  and the lidar simulations indicate that all 5 optical data ( $3\beta+2\alpha$ ) possess less than 15% random uncertainty for the bin, then measurements of that bin would support a  $3\beta+2\alpha$ -based microphysical inversion. We also consider the same question but for the  $3\beta+1\alpha$  dataset, where we exclude the 355 extinction measurement. We perform this yield analysis for the two orbital altitudes of 450 km and 820 km. The lower altitude is preferred from the standpoint of maximizing the signal-to-noise of a spaceborne lidar system, while the  
215 higher altitude would permit the spaceborne lidar to fly in formation with the A-train constellation, which includes Terra, Aqua and other satellites, thus increasing possibilities of data fusion from different spaceborne sensors. In these yield studies, it must be remembered that cloud-free simulations from GEOS-5 have been considered. We estimate later the influence of a cloudy atmosphere on these results.

Tables 2 and 3 provide the results of the yield studies for  $3\beta+2\alpha$  and  $3\beta+1\alpha$  retrievals where we have considered only  
220 retrievals over land and where various thicknesses of the lower atmosphere are studied. Land-based retrievals were used here to focus on the larger aerosol events that occur over land and are most likely to be the ones of interest in spaceborne lidar studies. Considering the lowest 3, 4, 5 km of the 8640 profiles in the GEOS-5 simulation indicates that 36%, 31% and 27%, respectively, of the bins over land have extinction at 532 nm of  $0.02 \text{ km}^{-1}$  or greater. These are the bins considered to

“qualify” for a microphysical inversion if the suite of multiwavelength lidar measurements of that bin are of sufficient quality. From an orbital altitude of 450 km, and considering the  $3\beta+2\alpha$  ( $3\beta+1\alpha$ ) measurement suite, approximately 15% (35%) of those qualifying bins would be measured with uncertainties of 15% or better. The large increase in the number of bins measured with 15% uncertainty when considering only  $3\beta+1\alpha$  is due to the fact that the measurement deleted is the 355 nm extinction, which is the one that possesses the highest noise in the simulations. The 355 nm measurements are the noisiest due to the lower laser output power at 355 and the considerably higher atmospheric attenuation that exists at this wavelength versus 532 nm. From an orbital altitude of 820 km, and considering  $3\beta+2\alpha$  ( $3\beta+1\alpha$ ) measurements, approximately 3% (15%) of the qualifying bins are measured with 15% uncertainty or better. One should realize that while the  $3\beta+1\alpha$  based inversions provide a higher yield, the information content of those inversions will be less than those based on  $3\beta+2\alpha$ .

## 6.2 Inversion Comparison

GEOS-5 contains information that either directly or indirectly can be converted to aerosol microphysical parameters. The aerosol module is based on the Goddard Chemistry, Aerosol, Radiation, and Transport (GOCART) model (Chin et al. 2002; Colarco et al. 2010). The GOCART module carries aerosol mass in a series of tracers: 5 tracers representing size of dust, 5 tracers representing size of sea salt, 2 tracers each of black and organic carbon (one for hydrophobic and one for hydrophilic modes) and 1 tracer for sulfate. The conversion of the resolved species masses to optical quantities is done through pre-computed lookup tables, where for each tracer a dry particle size distribution is assumed, along with a hygroscopic growth factor, which is a function of relative humidity (hygroscopic growth is relevant for sulfate, sea salt, and hydrophilic carbon, and is not considered for dust and hydrophobic carbon). For dust and sea salt, the particle size distribution is explicitly resolved. Spectral refractive indices are input for generating the lookup tables, primarily from the OPAC (Optical Properties of Aerosols and Clouds) database (Hess et al. 1998), and the lookup tables are calculated assuming Mie theory. The exception is for dust, where a spectrally varying but weakly absorbing dust refractive index is assumed and particle non-sphericity is considered for determining optical properties using the database from Meng et al. (2010) (see also Colarco et al. 2014b; Buchard et al. 2015). Further details are provided in Colarco et al. (2010). The lookup tables therefore establish the linkage between the bulk mass simulated, the assumed particle microphysical properties, and the optical quantities input to the lidar retrievals.

In the studies done here, we consider the GEOS-5 aerosol microphysics as the baseline for comparing the different inversions of optical data. For these inversions, we consider both regularization and linear estimation techniques and different sets of input optical data: 1) the optical data contained in GEOS-5 and 2) the simulated lidar optical data. For both of these optical data sources we consider  $3\beta+2\alpha$  and  $3\beta+1\alpha$ . We perform the inversions and then make comparisons of effective radius, volume, surface area and index of refraction. For the inversions done here, we limited the range of imaginary refractive index to  $m_i \leq 0.01$ , or low absorbing particles, due to the increase in uncertainty for retrievals of more highly absorbing particles shown in earlier studies (Veselovskii et al., 2005). All qualifying cases were separated into fine, mixed and coarse aerosol modes using the fine mode fraction as determined using the spectral deconvolution technique (O’Neil et al., 2003) applied to the GEOS-5 optical data. Based on this size classification, the radius constraints were determined as shown below in a similar manner as done in Pérez-Ramírez et al., (2015). For all cases, the real part of the index of refraction was allowed to vary between 1.35 – 1.65 in steps of 0.0025 and the imaginary index varied between 0.001 and 0.01 with steps of 0.001.

Fine Mode Dominant:  $\eta > 0.75$ ,  $R_{\min} = 0.075$  and  $R_{\max} = 2 \text{ } \mu\text{m}$   
Mixture of Modes:  $0.25 < \eta < 0.75$ ,  $R_{\min} = 0.075$  and  $R_{\max} = 10 \text{ } \mu\text{m}$   
Coarse Mode Dominant:  $\eta < 0.25$ ,  $R_{\min} = 0.3$  and  $R_{\max} = 10 \text{ } \mu\text{m}$

265 Using the above inversion schemes and input datasets, examples of aerosol volume comparisons are given in Fig. 3, where both fine mode cases (2098 qualifying cases with random uncertainty less than 15% in all optical channels as done in Table 2) and coarse mode cases ( $\# = 1439$ ) are shown. In this figure, the volume directly from GEOS-5 is shown along with the inverted volume using various combinations of data and inversion scheme as follows:

1. Using simulated Lidar optical data with GEOS-5 optical data as input to the simulator
  - 270 1. Regularization with  $3\beta + 2\alpha$
  2. Regularization with  $3\beta + 1\alpha$
  3. Linear Estimation with  $3\beta + 2\alpha$
  4. Linear Estimation with  $3\beta + 1\alpha$
2. Using GEOS-5 optical data directly
  - 275 1. Regularization with  $3\beta + 2\alpha$
  2. Regularization with  $3\beta + 1\alpha$
  3. Linear Estimation with  $3\beta + 2\alpha$
  4. Linear Estimation with  $3\beta + 1\alpha$

280 To be clear, the GEOS-5 optical data are the ones that are used as inputs to the lidar simulator model and are therefore inherently noise-free. An example of the GEOS-5 profile data used in these simulations and inversions is given as the “GEOS532” profile in Fig. 1. In Figs. 3 and 4, only qualifying cases have been included.

Figure 3 shows the comparisons of histograms of aerosol volume retrievals using all the combinations of data and inversion techniques shown above for the cases (left) where the fine mode fraction is greater than 0.75; indicative of fine mode cases and (right) where the fine mode fraction is  $> 0.25$  indicative of coarse mode cases. Aerosol volume has proven to be one of the more robustly retrievable microphysical quantities using the multiwavelength lidar technique due to a generally good correlation between the measured extinction and particle volume. In these comparisons, we take the GEOS-5 microphysical data as the reference and compare the histograms of the inverted microphysical data to that of GEOS-5. In general, for the fine mode cases shown in Fig. 3, the different volume retrievals agree well with each other and with GEOS-5 although there is a tendency for the inversions to show a larger number of small volume cases (c.f. the peak around  $15\text{--}20 \text{ } \mu\text{m}^3 \text{ cm}^{-3}$ ) and a smaller number of larger volume cases (c.f. in the vicinity of  $100 \text{ } \mu\text{m}^3 \text{ cm}^{-3}$ ) than the GEOS-5 reference. On the right of Fig. 3 is shown the comparison of coarse mode cases where it is apparent that the histograms of all inversion schemes show considerable disagreement with the GEOS-5 reference.

295 We investigate these disagreements further by considering the histograms of effective radius shown in Fig. 4. The fine mode cases are shown on the left and the coarse mode cases on the right. We consider first the fine mode cases shown on the left. Close inspection of these cases indicates that the  $3\beta + 2\alpha$  based retrievals are better able to retrieve particle sizes down to  $0.1 \text{ } \mu\text{m}$  but that all retrieval schemes under-represent these small particles, consistent with the small particle insensitivity revealed in earlier information content studies (Veselovskii et al., 2005). The situation is considerably worse when



300 considering  $3\beta+1\alpha$  based retrievals with all fine mode case retrievals performing poorly in representing small particles although the regularization technique does show more skill in this respect. The loss of the 355 nm extinction measurement clearly compromises the ability to retrieve the smallest particles sizes. On the right of Fig. 4 is shown the comparison of coarse mode cases where it is clear that no retrieval scheme is able to capture the sizes associated with the sea salt aerosols that are present in GEOS-5. Figure 4 can be used to better understand the degradation of agreement between the retrieved volumes and the GEOS-5 histograms shown in Fig. 3 as particle size increases.

305 The preceding discussion concerning volume and effective radius retrievals has been qualitative in nature. To better quantify the performance of the various retrieval schemes with respect to the GEOS-5 reference we will quantify the comparison of the different retrieval schemes in the following ways. For all parameters except refractive index, a root-mean-square deviation metric is calculated as a percentage as

$$100 \frac{1}{N} \frac{\sum \sqrt{(X_{GEOS} - X_{Ret})^2}}{X_{GEOS}} \quad (1)$$

310 where  $X_{GEOS}$  is the reference microphysical quantity from GEOS-5 and  $X_{Ret}$  is the inverted microphysical value using one of the inversion schemes under consideration. For the refractive index comparisons, we calculate the fractional deviation metric as

$$\frac{1}{N} \sum \sqrt{(X_{GEOS} - X_{Ret})^2} \quad (2)$$

Equations (1) and (2) were evaluated for each individual retrieval and the composite values presented in Tables 4 and 5. Deviations are color-coded in green, yellow and red based on the magnitude of the deviation metric and consideration of the desired uncertainty in the retrieved quantities discussed in the ACE draft report of 2010. The color coding scheme is given in Table 6, where green indicates values fully consistent with the desired uncertainties expressed in the draft report, yellow indicates marginal consistency, while red indicates uncertainties inconsistent with desired uncertainties.

320 Table 4 considers the deviation between inversions based on GEOS-5 optical data and the microphysics inherent in GEOS-5. To be clear, the profiles used in these inversions are not generated by the lidar simulator but rather are the ones that come from GEOS-5 and are used as input to the lidar simulator. The results shown in Table 5, by contrast, are based on inversions of simulated lidar data with varying amounts of random uncertainty. The results shown in Table 4 can be considered as a type of information content study since there are no random errors in the input optical data; the data are derived from GEOS-5 microphysics using Mie scattering codes. Table 5 considers inversion results based on the simulated lidar profiles that use as their input the GEOS-5 optical profiles that were used to generate Table 4. Table 5 therefore quantifies the retrieval capability of the candidate spaceborne lidar using the different inversion approaches considered while the comparison of Tables 4 and 5 can be used to study the influence of random errors on the various retrieval techniques.

330 For the fine mode cases shown in Table 4, the regularization retrieval using  $3\beta+2\alpha$  input optical data agrees well with the GEOS-5 microphysics for all quantities, except for the retrieved imaginary index which is slightly outside of the desired bounds. The other retrieval schemes show progressively poorer agreement with the GEOS-5 microphysics as you consider regularization ( $3\beta+1\alpha$ ), LE ( $3\beta+2\alpha$ ), LE ( $3\beta+1\alpha$ ). For a mixture of particles, regularization with either  $3\beta+2\alpha$  or  $3\beta+1\alpha$  input data perform similarly and generally as well as each other except that the real part of the refractive index shows considerable deviation from the reference. The imaginary index is closer to the desired values, though, than for the fine mode cases.

335 Again, as in the fine mode comparisons, the linear estimation retrievals do not perform as well for these mixed mode cases as those based on regularization. Considering the coarse mode cases, only surface area, which is highly correlated with the optical extinction values, can be retrieved by any of the retrieval schemes with good accuracy. In general, Table 4 indicates that the regularization technique shows more skill in inverting these noise-free data into the desired microphysical information and performs well for fine and mixed mode cases.

340 Table 5 provides the comparison of the reference GEOS-5 microphysics with the inversions based on simulated lidar data for the system specifications shown in Table 1 and a 450 km orbital altitude. Figure 1 contains examples of the input data used for these inversion studies. A quick look at Table 5 indicates that these inversions based on simulated lidar data show larger deviations from the GEOS-5 microphysics than the results shown in Table 4 based on noise-free data. For fine mode cases, effective radius retrievals show considerable deviation from the GEOS-5 reference although volume is retrieved well when using the regularization technique. It should be noted that these retrievals of volume are essentially insensitive to random  
345 uncertainties of up to 50%. For the case of mixed mode retrievals using simulated lidar data, the most conspicuous result is that the regularization technique coupled with  $3\beta+1\alpha$  optical data shows considerable skill at retrieving all quantities except the real part of the refractive index. These comparisons degrade only slightly for increasing random uncertainty up to 50%. For coarse mode cases, retrievals of surface area are very robust for all inversion techniques and for random uncertainties up to 50% although the LE based retrievals consistently show slightly smaller deviations than those of regularization.

## 350 7 Discussion and Conclusions

Our work indicates that the spaceborne lidar simulated here would possess substantially improved backscatter measurements over previous spaceborne lidars such as GLAS and CALIPSO. Although not tested here, these higher signal-to-noise measurements should improve the ability to retrieve boundary layer heights and to detect thin cirrus. The addition of pure molecular measurements through the HSRL technique will permit direct measurements of aerosol optical thickness and  
355 extinction. The combination of backscatter and extinction measurements permits retrievals of aerosol microphysical quantities as shown here.

The availability of atmospheric profiles along a 24-hr satellite track from GEOS-5 has permitted us to assess the yield of a spaceborne lidar under realistic conditions globally and with large statistics. In this effort, we defined yield based on a maximum uncertainty of 15% for aerosol extinction values in excess of  $0.02 \text{ km}^{-1}$ , although some results in this paper  
360 indicate that inversions can tolerate considerably higher amounts of random uncertainty for certain quantities such as 1) surface area for mixed and coarse mode aerosols and 2) volume for fine mode aerosols. The yield from a 450 km orbit, not accounting for clouds, is approximately 4-5% when considering the use of  $3\beta+2\alpha$  input data. Yields increase by approximately a factor of 2.5 when considering inversions based on  $3\beta+1\alpha$  input data. Inversions based on  $3\beta+1\alpha$  input data support only estimates of volumetric quantities, however. There are instances, such as for mixed mode aerosols, where  
365 retrievals based on  $3\beta+1\alpha$  show higher skill than those based on  $3\beta+2\alpha$  and the retrievals are highly resistant to input uncertainty. Yields in such cases will be considerably higher than shown in Tables 2 and 3. For reasonable estimates of the particle size distribution from lidar, however, the full  $3\beta+2\alpha$  input dataset is needed along with the regularization technique. The increased resistance to uncertainty when inverting the  $3\beta+1\alpha$  dataset can be understood from Perez-Ramirez et al., (2013) where it was shown that biases in the input extinction data cause larger deviations in the retrieved parameters than the  
370 same uncertainty in input backscatter data would produce. Therefore, elimination of the 355 nm from the input dataset results in a more stable inversion that can tolerate higher amounts of input noise.

375 It is no surprise that the yields from an orbital altitude of 820 km are lower than from 450 km. From 820 km, using the full  $3\beta+2\alpha$  dataset, yields are approximately 1%. The use of the  $3\beta+1\alpha$  dataset results in a yield increase of a factor of 5 from 820 km. Again, the high resistance of certain retrievals to uncertainty in the input data imply that real yields for certain quantities would be higher than those shown in Tables 2 and 3. To simplify data analysis, this study ignored the cloud fields present in GEOS-5. Estimates of cloud abundance based on the CALIPSO data from July 24, 2009 indicate that yields for aerosol inversions below 5 km, as provided in Tables 2 and 3, would be reduced by a factor of approximately 5-10 if clouds had been included in the analysis.

380 Here we have constrained the retrievals based on the fine mode fraction as determined using the spectral deconvolution technique. In under-determined problems such as this, the selection of appropriate constraints is an important part of the solution technique and we did not make use of the depolarization measurements, which are expected to be available on an ACE lidar system, in determining the constraints. Use of such depolarization data to aid aerosol typing (Burton et al., 2014) could further narrow the constraints used and potentially improve the inversion results. Consideration of the backscattering Ångström exponent can also add information that can be used for constraint (Veselovskii et al., 2015). It is expected, however, that with  $3\beta+2\alpha$  optical data there will be some lack of sensitivity to both the smallest and largest particles in naturally occurring aerosol size distributions (Veselovskii et al., 2005) and the results presented here reflect that lack of sensitivity. We also have only considered low absorbing solutions ( $m_i < 0.01$ ) since previous work has also indicated increased inversion uncertainties for more highly absorbing particles (Veselovskii et al., 2005). We avoided those difficulties by not considering solutions with  $m_i > 0.01$ .

390 The use of a 24-hour atmospheric simulation from GEOS-5 along with the reference aerosol microphysics values from GEOS-5 provided a large set of statistics for comparison of techniques. Those statistics are summarized in Tables 4 and 5. The conclusions that can be drawn from the results shown in these tables are as follows:

- 395 1. Effective radius was well retrieved for fine mode distributions if the optical data were noise-free but the addition of random uncertainty up to 15% to the input optical data degraded the retrieval of effective radius significantly. A lack of sensitivity to particles with sizes less than  $0.1 \mu\text{m}$  was demonstrated.
2. Overall, surface area was the most easily retrieved quantity with good retrievals occurring, depending on inversion technique, for random uncertainties up to 50%.
3. For coarse mode aerosols, only surface area retrievals were reliable. A lack of sensitivity to particle sizes of  $\sim 2.0 \mu\text{m}$  and greater was demonstrated.
- 400 4. Retrievals showed resistance to random errors up to 50% for the following cases:
  1. fine mode volume retrievals
  2. mixed mode V, S,  $m_i$  retrievals
  3. coarse mode surface concentration
- 405 5. The regularization technique, in general, performed better than the linear estimation technique with LE performing slightly better than regularization only for the coarse mode surface area retrievals

The degraded performance of the lidar-based inversions for mixed mode and coarse mode cases is related to the decreased information content for large particles as previously stated. Also, these larger particles include cases of irregularly shaped dust which cannot be accurately described by the Mie kernels used in these inversions. Spheroidal models have been used for

410 inversion of lidar data in the case of dust aerosols (Veselovskii et al., 2010) although there remains uncertainty in how well the spheroidal model captures the scattering properties of various irregular aerosol types.

The work presented here has been done in the context of the ACE decadal survey mission. We have studied the aerosol microphysical retrieval capability of a candidate lidar without input from other data sources. Such information is useful to understand the inherent capabilities of a spaceborne lidar given that during the nighttime, lidar retrievals may be the only  
415 source of certain aerosol microphysical information. The work done here is hardly an exhaustive study of the ability to invert aerosol microphysics from spaceborne lidar data, however. Rather it should be considered an initial study that can help to point toward needed refinements. For example, as mentioned above, the retrieval of effective radius for fine mode cases degraded significantly between the GEOS-5 based inversions and the lidar based ones that used data with 0-15% random uncertainty. By additional studies, we found that either constraining the maximum radius to no larger than 1 micron or  
420 further limiting the maximum random uncertainty brought the inversion results into much better agreement with the GEOS-5 reference. In this way, the tables point toward other inversion sensitivity studies that would be useful for determining optimized constraints. In this process, the question arises for how to tighten the constraints used in the inversions in actual practice. In order to do so, other methods of constraint based on aerosol typing or the use of depolarization data and spheroidal kernels can be studied. Such studies will add useful information and help to determine an optimized approach for  
425 inverting multiwavelength lidar data in the absence of ancillary data as will be needed during the nighttime for a space mission. During the daytime, however, there should be other sources of data such as the anticipated polarimeter instrument, from which column-averaged aerosol microphysical information can be determined (Mischenko et al., 1997, Dubovik et al., 2011). While additional work remains in refining the approach for optimal retrieval of aerosols from lidar alone as done here, initial promising steps (Liu et al., 2015) are being taken to develop joint inversions that couple lidar and polarimeter data.  
430 Much future work should be focused in this new area as well.

## Acknowledgement

This work was supported by NASA Headquarters are part of the ACE pre-formulation study. It has also been supported by the Marie Skłodowska-Curie Individual Fellowships (IF) ACE\_GFAT (grant agreement No 659398). The authors gratefully acknowledge several fruitful discussions and exchanges with Chris Hostetler, Rich Ferrare, Jon Hair, Kathy Powell, Detlef  
435 Müller and Sharon Burton of NASA/Langley Research Center.

## References

1. Ansmann, A., Petzold, A., Kandler, K., Tegen, I., Wendisch, M., Müller, D., Weinzierl, B., Müller, T., Heintzenberg, J.: Saharan Mineral Dust Experiments SAMUM-1 and SAMUM-2: what have we learned?, *Tellus*, 63B, 403–429, 2011.
- 440 2. Böckmann C., Miranova I., Müller D., Scheidenbach L., Nessler R., “Microphysical aerosol parameters from multiwavelength lidar,” *J. Opt. Soc. Am. A* 22, 518–528 (2005).
3. Buchard, V., da Silva, A. M., Colarco, P., Krotkov, N., Dickerson, R. R., Stehr, J. W., et al. (2014). Evaluation of GEOS-5 sulfur dioxide simulations during the Frostburg, MD 2010 field campaign. *Atmospheric Chemistry and Physics*, 14(4), 1929–1941. <http://doi.org/10.5194/acp-14-1929-2014>

- 445 4. Buchard, V., da Silva, A. M., Colarco, P. R., Darmenov, A., Randles, C. A., Govindaraju, R., et al. (2015). Using the  
OMI aerosol index and absorption aerosol optical depth to evaluate the NASA MERRA Aerosol Reanalysis.  
*Atmospheric Chemistry and Physics*, 15(10), 5743–5760. <http://doi.org/10.5194/acp-15-5743-2015>
5. Buchard, V., da Silva, A. M., Randles, C. A., Colarco, P., Ferrare, R., Hair, J., et al. (2016). Evaluation of the surface  
450 PM<sub>2.5</sub> in Version 1 of the NASA MERRA Aerosol Reanalysis over the United States. *Atmospheric Environment*,  
125(Part A), 100–111. <http://doi.org/10.1016/j.atmosenv.2015.11.004>
6. Burton S. P., Ferrare R. A., Hostetler C. A., Hair J. W., Rogers R. R., Obland M. D., Butler C. F., Cook A. L.,  
Harper D. B., Froyd K. D., “Aerosol classification using airborne High Spectral Resolution Lidar measurements –  
methodology and examples”, *Atmos. Meas. Tech.*, 5, 73–98, 2012.
7. Burton, S. P., Vaughan, M. A., Ferrare, R. A. and Hostetler, C. A.: Separating mixtures of aerosol types in airborne  
455 High Spectral Resolution Lidar data. *Atmos. Meas. Tech.*, 7, 419–436, 2014
8. Chin, M., Ginoux, P., Kinne, S., Torres, O., Holben, B., Duncan, B., et al. (2002). Tropospheric aerosol optical  
thickness from the GOCART model and comparisons with satellite and Sun photometer measurements. *Journal of  
the Atmospheric Sciences*, 59(3), 461–483.
9. Colarco, P., Da Silva, A., Chin, M., & Diehl, T. (2010). Online simulations of global aerosol distributions in the  
460 NASA GEOS-4 model and comparisons to satellite and ground-based aerosol optical depth. *Journal of Geophysical  
Research-Atmospheres*, 115, –. <http://doi.org/10.1029/2009JD012820>
10. Colarco, P. R., Kahn, R. A., Remer, L. A., & Levy, R. C. (2014a). Impact of satellite viewing-swath width on global  
and regional aerosol optical thickness statistics and trends. *Atmospheric Measurement Techniques*, 7(7), 2313–2335.  
<http://doi.org/10.5194/amt-7-2313-2014>
- 465 11. Colarco, P. R., Nowottnick, E. P., Randles, C. A., Yi, B., Yang, P., Kim, K.-M., et al. (2014b). Impact of radiatively  
interactive dust aerosols in the NASA GEOS-5 climate model: Sensitivity to dust particle shape and refractive  
index. *Journal of Geophysical Research-Atmospheres*, 119(2), 753–786. <http://doi.org/10.1002/2013JD020046>
12. Darmenov, Anton, and Arlindo da Silva (2015). **The Quick Fire Emissions Dataset (QFED): Documentation of  
versions 2.1, 2.2 and 2.4**. *NASA/TM-2015-104606*, Vol. 38.
- 470 13. de Graaf M1, A. Apituley . D. P. Donovan, Feasibility study of integral property retrieval for tropospheric aerosol  
from Raman lidar data using principal component analysis, *Appl Opt.* 2013 Apr 1;52(10):2173-86. doi:  
10.1364/AO.52.002173.
14. Donovan D., Carswell, A.: Principal component analysis applied to multiwavelength lidar aerosol backscatter and  
extinction measurements, *Appl.Opt.*,36, 9406-9424, 1997.
- 475 15. Dubovik, O, M. Herman, A. Holdak, T. Lapyonok, D. Tanre, J. L. Deuze, F. Ducos, A. Sinyuk,  
and A. Lopatin. “Statistically optimized inversion algorithm for enhanced retrieval of aerosol properties from  
spectral multi-angle polarimetric satellite observations”. 975-1018. 4. 5. doi:10.5194/amt-4-975-2011  
<http://www.atmos-meas-tech.net/4/975/2011/>. 2011
16. Garvin, J., J. Bufton, J. Blair, D. Harding, S. Luthcke, J. Frawley, and D. Rowlands, 1998. Observation of the  
480 Earth’s Topography from Shuttle Laser Altimeter (SLA): Laser-pulse Echo-recovery Measurements of Terrestrial  
Surfaces, *Phys. Chem. Earth*, 23(9-10), pp. 1053-1068
17. Hess, M., Koepke, P., & Schult, I. (1998). Optical properties of aerosols and clouds: The software package OPAC.  
*Bulletin of the American Meteorological Society*, 79(5), 831–844.

18. Kessner, A. L., Wang, J., Levy, R. C., & Colarco, P. R. (2013). Remote sensing of surface visibility from space: A look at the United States East Coast. *Atmospheric Environment*, 81(C), 136–147.  
<http://doi.org/10.1016/j.atmosenv.2013.08.050>
19. Liu, X., R. Ferrare, C. Hostetler, S. Burton, S. Stammes, D. Mueller, E. Chemyakin, P. Sawamura, and Brian Cairns, Optimal Estimation Retrievals of Aerosol Microphysical Properties from High Spectral Resolution Lidar (HSRL) and Polarimeter Data , presented at the Fall AGU meeting, San Francisco, CA 17 December, 2015
20. McCormick, M. P., Winker, D. M., Browell, E. V., Coakley, J. A., Gardner, C. S., Hoff, R. M., Kent, G. S., Melfi, S. H., Menzies, R. T., Platt, C. M. R., Randall, D. A., and Reagan, J. A., Scientific investigations planned for the Lidar In-space Technology Experiment (LITE), *Bull. Amer. Meteorol. Soc.*, 74, 2, 205-214, Feb. 1993
21. Measures, R. M., *Laser Remote Sensing Fundamentals and Applications* (Wiley, New York, 1984).
22. Mishchenko, M. I., L. D. Travis, Satellite retrieval of aerosol properties over the ocean using polarization as well as intensity of reflected sunlight, *J. Geophys. Res.*, Vol. 102, No. D14, 16,989-17,013, July 27, 1997
23. Müller, D., Wandinger, U., and Ansmann, A.: Microphysical particle parameters from extinction and backscatter lidar data by inversion with regularization: theory, *Applied Optics*, 38, 2346-2357, 1999a.
24. Müller, D., Wandinger, U., and Ansmann, A.: Microphysical particle parameters from extinction and backscatter lidar data by inversion with regularization: simulation, *Applied Optics*, 38, 2358-2368, 1999b.
25. Müller, D., Veselovskii, I., Kolgotin, A., Tesche, M., Ansmann, A., Dubovik, O.: Vertical profiles of pure dust (SAMUM-1) and mixed smoke-dust plumes (SAMUM-2) inferred from inversion of multiwavelength Raman/polarization lidar data and comparison to AERONET retrievals and in-situ observations, *Appl.Opt.* 52, 3178-3202, 2013.
26. Nowottnick, E. P., Colarco, P. R., Welton, E. J., & da Silva, A. (2015). Use of the CALIOP vertical feature mask for evaluating global aerosol models. *Atmospheric Measurement Techniques*, 8(9), 3647–3669.  
<http://doi.org/10.5194/amt-8-3647-2015>
27. O'Neill, N.T., Eck, T.F., Smirnov, A., Holben, B., and Thulasiraman, S.: Spectral discrimination of coarse and fine mode optical depth, *Journal of Geophysical Research*, 108, 4559, 2003.
28. Pérez-Ramírez, D., D. N. Whiteman, I. Veselovskii, A. Kolgotin, M. Korenskiy, and L. Alados-Arboledas, Effects of systematic and random errors on the retrieval of particle microphysical properties from multiwavelength lidar measurements using inversion with regularization, *Atmos. Meas. Tech.*, 6, 3039-3054, 2013
29. Pérez-Ramírez, D., I. Veselovskii, D. N. Whiteman, A. Suvorina, M. Korenskiy, A. Kolgotin, B. Holben, O. Dubovik, A. Siniuk, and L. Alados-Arboledas: “High temporal resolution estimates of columnar aerosol microphysical parameters from spectrum of aerosol optical depth by Linear Estimation: application to long-term AERONET and Star-photometry measurements”, *Atmos. Meas. Tech.*, 8, 3117–3133, 2015.
30. Rienecker, M., Suarez, M., Todling, R., Bacmeister, J., Takacs, L., Liu, H.-C., et al. (2008). The GEOS-5 Data Assimilation System--Documentation of Version 5.0.1, 5.1.0, and 5.2.0. *NASA Technical Report Series on Global Modeling and Data Assimilation*, 27, 1–118.
31. Rienecker, M. M., Suarez, M. J., Gelaro, R., Todling, R., Bacmeister, J., Liu, E., et al. (2011). MERRA: NASA's Modern-Era Retrospective Analysis for Research and Applications. *Journal of Climate*, 24(14), 3624–3648.  
<http://doi.org/10.1175/JCLI-D-11-00015.1>

32. Rogers, R. R., J. W. Hair, C. A. Hostetler, R. A. Ferrare, M. D. Obland, A. L. Cook, D. B. Harper, S. P. Burton, Y. Shinozuka, C. S. McNaughton, A. D. Clarke, J. Redemann, P. B. Russell, J. M. Livingston, and L. I. Kleinman: NASA LaRC airborne high spectral resolution lidar aerosol measurements during MILAGRO: observations and validation *Atmos. Chem. Phys.*, 9, 4811–4826, 2009
33. Shipley, S.T., D.H. Tracy, E.W. Eloranta, J.T. Trauger, J.T. Sroga, F.L. Roesler and J.A. Weinman, "A High Spectral Resolution Lidar to Measure Optical Scattering Properties of Atmospheric Aerosols, Part I: Instrumentation and Theory", *Applied Optics*, 23, 3716-3724, 198
34. Smith, D. E., M.a T. Zuber, H. V. Frey, J. B. Garvin, J. W. Head, D. O. Muhleman, G. H. Pettengill, R. J. Phillips, S. C. Solomon, H. J. Zwally, W. B. Banerdt, T. C. Duxbury, M. P. Golombek, F. G. Lemoine, G. A. Neumann, D. D. Rowlands, O. Aharonson, P. G. Ford, A. B. Iranov, C. L. Johnson, P. J. McGovern, J. B. Abshire, R. S. Afzal, X. Sun, Mars Orbiter Laser Altimeter: Experiment summary after the first year of global mapping of Mars, *J. Geophys Res.*, VOL. 106, NO. E10, ppS 23,689-23,722, October 25, 2001
35. Spinhirne, J. D., S. P. Palm, W. D. Hart, D. L. Hlavka, and E. J. Welton (2005), Cloud and aerosol measurements from GLAS: Overview and initial results, *Geophys. Res. Lett.*, 32, L22S03, doi:10.1029/2005GL023507.
36. Spurr, R. J. D. :VLIDORT: A linearized pseudo-spherical vector discrete ordinate radiative transfer code for forward model and retrieval studies in multilayer multiple scattering media, *Journal of Quantitative Spectroscopy and Radiative Transfer*, Volume 102, Issue 2, p. 316-342, 2006
37. Twomey, S.: *Introduction to the Mathematics of Inversion in Remote Sensing and Linear Measurements*, Elsevier, New York, 1977
38. Veselovskii, I., Kolgotin, A., Griaznov, V., Müller, D., Wandinger, U., and Whiteman, D.N.: Inversion with regularization for the retrieval of tropospheric aerosol parameters from multiwavelength lidar sounding, *Applied Optics*, 41, 3685-3699, 2002.
39. Veselovskii, I., Kolgotin, A.; Mueller, D.; Whiteman, D.N., Information content of multiwavelength lidar data with respect to microphysical particle properties derived from eigenvalue analysis. *Applied Optics*, Vol. 44, No. 25, 01.09.2005, p. 5292-5303.
40. Veselovskii I., Dubovik, O., Kolgotin, A., Lapyonok, T., Di Girolamo, P., Summa, D., Whiteman, D. N., Mishchenko, M., and Tanré, D.: Application of randomly oriented spheroids for retrieval of dust particle parameters from multiwavelength lidar measurements, *J. Geophys. Res.*, 115, D21203, doi:10.1029/2010JD014139, 2010.
41. Veselovskii I., Dubovik O., Kolgotin A., Korenskiy M., Whiteman D. N., Allakhverdiev K., Huseyinoglu F." Linear estimation of particle bulk parameters from multi-wavelength lidar measurements", *Atmos. Meas. Tech.* 5, 1135–1145, 2012.
42. Veselovskii, I., D. N. Whiteman, M. Korenskiy, A. Suvorina, A. Kolgotin, A. Lyapustin, Y. Wang, M. Chin, H. Bian, T. L. Kucsera, D. Perez-Ramirez, B. Holben, "Characterization of forest fire smoke event near Washington, D.C. in Summer 2013 with multi-wavelength lidar", *Atmos. Chem. Phys.* 15, 1647–1660, 2015.
43. Whiteman, D. N., G. Schwemmer, T. Berkoff, H. Plotkin, L. Ramos-Izquierdo, G. Pappalardo, Performance modeling of an airborne Raman water vapor lidar, *Appl Opt*, 40, No. 3, 375-390. (2001)
44. Whiteman, David N., Kurt Rush, Scott Rabenhorst, Wayne Welch, Martin Cadirola, Gerry McIntire, Felicita Russo, Mariana Adam, Demetrius Venable and Rasheen Connell, Igor Veselovskii, Ricardo Forno, Bernd Mielke and

Bernhard Stein, Thierry Leblanc and Stuart McDermid, Holger Vömel, Airborne and Ground-based measurements using a High-Performance Raman Lidar, doi:10.1175/2010JTECHA1391.1 (2010).

45. Whiteman, D.N., I. Veselovskii, M. Cadirola, K. Rush, J. Comer, J. Potter, R. Tola, Demonstration Measurements of Water Vapor, Cirrus Clouds, and Carbon Dioxide Using a High-Performance Raman Lidar, *J. Atmos. Ocean. Tech.*, 24 (8), 1377-1388 (2007)
46. Winker, D. M., J. Pelon, J. A. Coakley, Jr., S. A. Ackerman, R. J. Charlson, P. R. Colarco, P. Flamant, Q. Fu, R. Hoff, C. Kittaka, T. L. Kubar, H. Le Treut, M. P. McCormick, G. Megie, L. Poole, K. Powell, C. Trepte, M. A. Vaughan, B. A. Wielicki, 2010: The CALIPSO Mission: A Global 3D View Of Aerosols And Clouds, *Bull. Am. Meteorol. Soc.*, 91, 1211-1229, doi:10.1175/2010BAMS3009.1.

565
