# Supplementary material for: Simulations of spaceborne multiwavelength lidar measurements and retrievals of aerosol microphysics
Source: Copernicus journal article supplement (doi:10.5194/amt-2016-174), 2016-06-07
Supplement: Supplementary file [file amt-2016-174-AC1-supplement.zip]

## Tables

| Simulated Lidar System Specifications            |                     |
|--------------------------------------------------|---------------------|
| Component/Parameter                              | Specification       |
| Laser Power (1064, 532, 355 nm)                  | 10W, 10W, 5W        |
| Laser Repetition Rate                            | 100 Hz              |
| Telescope Diameter                               | 1.5m                |
| Telescope Field of View                          | 130 micro radian    |
| Channel Bandwidths (1064, 532, 355 nm)           | 30 pm, 30 pm, 20 pm |
| Total optical efficiencies (molecular, particle) | 9.6%, 2.4%          |
| Data Acquisition Technique                       | Analog              |
| Orbital Altitudes Studied                        | 450 km, 820 km      |

Table 1. Specifications of the spaceborne lidar system used in the simulation study.

| Yield from 450 km                                          |                                                                                                |                                                                                      |                                                                                      |
|------------------------------------------------------------|------------------------------------------------------------------------------------------------|--------------------------------------------------------------------------------------|--------------------------------------------------------------------------------------|
| A bin is 450 m in the vertical and 80 km in the horizontal | Fraction of bins with extinction $\geq 0.02$ km <sup>-1</sup> @ 532 nm (i.e. "qualifying" bin) | Fraction of "qualifying" bins measured with $\leq 15\%$ uncertainty (3+2 inversions) | Fraction of "qualifying" bins measured with $\leq 15\%$ uncertainty (3+1 inversions) |
| Below 3 km                                                 | 36%                                                                                            | 15%                                                                                  | 36%                                                                                  |
| Below 4 km                                                 | 31%                                                                                            | 14%                                                                                  | 35%                                                                                  |
| Below 5 km                                                 | 27%                                                                                            | 14%                                                                                  | 35%                                                                                  |

Table 2. Yield from an orbital altitude of 450 km. Information is given on what fraction of bins in the GEOS-5 simulations possess sufficient extinction for inversion and then what fraction of those bins are measured with the desired uncertainty.

| Yield from 820 km                                          |                                                                                                |                                                                                      |                                                                                      |
|------------------------------------------------------------|------------------------------------------------------------------------------------------------|--------------------------------------------------------------------------------------|--------------------------------------------------------------------------------------|
| A bin is 450 m in the vertical and 80 km in the horizontal | Fraction of bins with extinction $\geq 0.02$ km <sup>-1</sup> @ 532 nm (i.e. “qualifying” bin) | Fraction of “qualifying” bins measured with $\leq 15\%$ uncertainty (3+2 inversions) | Fraction of “qualifying” bins measured with $\leq 15\%$ uncertainty (3+1 inversions) |
| Below 3 km                                                 | 36%                                                                                            | 3.0%                                                                                 | 15%                                                                                  |
| Below 4 km                                                 | 31%                                                                                            | 3.1%                                                                                 | 15%                                                                                  |
| Below 5 km                                                 | 27%                                                                                            | 2.9%                                                                                 | 14%                                                                                  |

Table 3. Yield from an orbital altitude of 820 km. Information is given on what fraction of bins in the GEOS-5 simulations possess sufficient extinction for inversion and then what fraction of those bins are measured with the desired uncertainty.

|                  | Comparisons Using GEOS-5 Optical Data for Inversions |                    |            |                   |                                     |                 |            |                   |                                  |                    |            |                   |
|------------------|------------------------------------------------------|--------------------|------------|-------------------|-------------------------------------|-----------------|------------|-------------------|----------------------------------|--------------------|------------|-------------------|
|                  | FINE MODE<br>( $\eta > 0.75$ )                       |                    |            |                   | MIXTURE<br>( $0.25 < \eta < 0.75$ ) |                 |            |                   | COARSE MODE<br>( $\eta < 0.25$ ) |                    |            |                   |
|                  | Reg<br>3b2a                                          | Reg<br>3b1a<br>532 | LE<br>3b2a | LE<br>3b1a<br>532 | Reg<br>3b2a<br>532                  | Reg 3b1a<br>532 | LE<br>3b2a | LE<br>3b1a<br>532 | Reg<br>3b2a                      | Reg<br>3b1a<br>532 | LE<br>3b2a | LE<br>3b1a<br>532 |
| $R_{\text{eff}}$ | 23.2                                                 | 51.1               | 26.7       | 66.1              | 13.0                                | 22.0            | 41.4       | 22.9              | 54.0                             | 65.1               | 69.2       | 68.5              |
| V                | 12.4                                                 | 16.7               | 21.5       | 31.9              | 14.5                                | 14.1            | 41.6       | 36.1              | 54.5                             | 67.8               | 71.4       | 72.0              |
| S                | 21.4                                                 | 39.8               | 30.1       | 53.5              | 11.5                                | 14.4            | 12.4       | 19.2              | 5.7                              | 16.2               | 9.9        | 12.7              |
| $m_r$            | 0.02                                                 | 0.02               | 0.03       | 0.03              | 0.13                                | 0.13            | 0.08       | 0.08              | 0.08                             | 0.15               | 0.09       | 0.10              |
| $m_i$            | 9E-3                                                 | 8E-3               | 9E-3       | 8E-3              | 2E-3                                | 2E-3            | 5E-3       | 4E-3              | 3E-3                             | 3E-3               | 4E-3       | 4E-3              |
| # of<br>data     | 3378                                                 |                    |            |                   | 1851                                |                 |            |                   | 2383                             |                    |            |                   |

Table 4: Comparison of GEOS-5 aerosol microphysical data and inversions of microphysical data using different sets of GEOS-5 optical data and both regularization and linear estimation inversion techniques. The values shown come from evaluation of the root-mean-square and fractional metrics that are defined in eqs. 1 and 2 in the text. In the column headings the type of retrieval scheme used is indicated (regularization or linear estimation) as well as the combination of optical input data. 3b2a means that the full  $3\beta+2\alpha$  optical input data have been used, while 3b1a532 indicates that only 1 extinction value was used and it was at 532 nm.

|           | Comparisons Using Simulated Lidar Data for Inversions |                     |            |                   |                       |                     |            |                   |                       |                     |            |                   |                       |                     |            |                   |                       |                     |            |                   |
|-----------|-------------------------------------------------------|---------------------|------------|-------------------|-----------------------|---------------------|------------|-------------------|-----------------------|---------------------|------------|-------------------|-----------------------|---------------------|------------|-------------------|-----------------------|---------------------|------------|-------------------|
|           | Case A: $\eta > 0.75$ (Fine Mode Predominance)        |                     |            |                   |                       |                     |            |                   |                       |                     |            |                   |                       |                     |            |                   |                       |                     |            |                   |
|           | Uncertainties 0-15 %                                  |                     |            |                   | Uncertainties 15-20 % |                     |            |                   | Uncertainties 20-30 % |                     |            |                   | Uncertainties 30-40 % |                     |            |                   | Uncertainties 40-50 % |                     |            |                   |
|           | Reg<br>3b2a                                           | Reg.<br>3b1a<br>532 | LE<br>3b2a | LE<br>3b1<br>a532 | Reg<br>3b2a           | Reg.<br>3b1a<br>532 | LE<br>3b2a | LE<br>3b1a<br>532 | Reg<br>3b2a           | Reg.<br>3b1a<br>532 | LE<br>3b2a | LE<br>3b1a<br>532 | Reg<br>3b2a           | Reg.<br>3b1a<br>532 | LE<br>3b2a | LE<br>3b1a<br>532 | Reg<br>3b2a           | Reg.<br>3b1a<br>532 | LE<br>3b2a | LE<br>3b1a<br>532 |
| $R_{eff}$ | 48.6                                                  | 59.3                | 44.9       | 73.3              | 51.2                  | 53.2                | 45.6       | 64.9              | 54.4                  | 55.2                | 49.7       | 67.2              | 53.2                  | 56.4                | 47.3       | 68.3              | 48.9                  | 59.8                | 43.1       | 61.2              |
| V         | 16.2                                                  | 18.4                | 22.1       | 30.5              | 16.7                  | 17.7                | 21.5       | 28.4              | 19.6                  | 19.4                | 23.5       | 28.4              | 17.7                  | 17.6                | 21.2       | 26.2              | 16.5                  | 17.3                | 20.1       | 25.3              |
| S         | 34.3                                                  | 39.3                | 35.3       | 52.3              | 33.7                  | 37.3                | 35.0       | 49.3              | 37.0                  | 38.7                | 34.5       | 48.9              | 35.5                  | 37.0                | 32.0       | 47.2              | 36.0                  | 35.9                | 28.2       | 43.4              |
| $m_r$     | 0.03                                                  | 0.03                | 0.04       | 0.03              | 0.03                  | 0.03                | 0.04       | 0.03              | 0.04                  | 0.03                | 0.04       | 0.03              | 0.04                  | 0.03                | 0.04       | 0.03              | 0.04                  | 0.04                | 0.05       | 0.03              |
| $m_i$     | 9E-3                                                  | 8E-3                | 8E-3       | 8E-3              | 8E-3                  | 8E-3                | 8E-3       | 7E-3              | 8E-3                  | 8E-3                | 7E-3       | 7E-3              | 8E-3                  | 8E-3                | 8E-3       | 8E-3              | 7E-3                  | 7E-3                | 7E-3       | 7E-3              |
|           | Case B: $0.25 < \eta < 0.75$ (Mixture)                |                     |            |                   |                       |                     |            |                   |                       |                     |            |                   |                       |                     |            |                   |                       |                     |            |                   |
|           | Uncertainties 0-15 %                                  |                     |            |                   | Uncertainties 15-20 % |                     |            |                   | Uncertainties 20-30 % |                     |            |                   | Uncertainties 30-40 % |                     |            |                   | Uncertainties 40-50 % |                     |            |                   |
|           | Reg.                                                  | Reg.<br>3b1a<br>532 | LE         | LE<br>3b1<br>a532 | Reg.                  | Reg.<br>3b1a<br>532 | LE         | LE<br>3b1a<br>532 | Reg.                  | Reg.<br>3b1a<br>532 | LE         | LE<br>3b1a<br>532 | Reg.                  | Reg.<br>3b1a<br>532 | LE         | LE<br>3b1a<br>532 | Reg.                  | Reg.<br>3b1a<br>532 | LE         | LE<br>3b1a<br>532 |
| $R_{eff}$ | 40.5                                                  | 22.6                | 52.1       | 23.0              | 42.4                  | 24.4                | 52.3       | 24.8              | 44.4                  | 24.2                | 54.2       | 25.6              | 52.0                  | 28.2                | 58.2       | 25.4              | 52.1                  | 33.1                | 57.8       | 25.8              |
| V         | 28.1                                                  | 19.9                | 52.5       | 40.1              | 30.7                  | 22.0                | 52.0       | 39.7              | 32.1                  | 22.6                | 53.7       | 40.7              | 37.0                  | 23.5                | 57.2       | 44.0              | 36.6                  | 28.8                | 56.5       | 39.8              |
| S         | 43.6                                                  | 22.1                | 16.0       | 26.2              | 46.7                  | 23.4                | 17.0       | 27.3              | 49.7                  | 23.8                | 17.4       | 27.6              | 60.0                  | 24.9                | 19.1       | 29.5              | 67.8                  | 25.6                | 21.9       | 28.8              |
| $m_r$     | 0.11                                                  | 0.13                | 0.08       | 0.08              | 0.11                  | 0.13                | 0.08       | 0.08              | 0.10                  | 0.12                | 0.08       | 0.08              | 0.11                  | 0.13                | 0.09       | 0.08              | 0.11                  | 0.12                | 0.09       | 0.08              |
| $m_i$     | 2E-3                                                  | 2E-3                | 5E-3       | 4E-3              | 2E-3                  | 2E-3                | 5E-3       | 4E-3              | 3E-3                  | 2E-3                | 5E-3       | 4E-3              | 2E-3                  | 2E-3                | 5E-3       | 4E-3              | 2E-3                  | 2E-3                | 5E-3       | 4E-3              |
|           | Case C: $\eta < 0.25$ (Coarse Mode Predominance)      |                     |            |                   |                       |                     |            |                   |                       |                     |            |                   |                       |                     |            |                   |                       |                     |            |                   |
|           | Uncertainties 0-15 %                                  |                     |            |                   | Uncertainties 15-20 % |                     |            |                   | Uncertainties 20-30 % |                     |            |                   | Uncertainties 30-40 % |                     |            |                   | Uncertainties 40-50 % |                     |            |                   |
|           | Reg.                                                  | Reg.<br>3b1a<br>532 | LE         | LE<br>3b1<br>a532 | Reg.                  | Reg.<br>3b1a<br>532 | LE         | LE<br>3b1a<br>532 | Reg.                  | Reg.<br>3b1a<br>532 | LE         | LE<br>3b1a<br>532 | Reg.                  | Reg.<br>3b1a<br>532 | LE         | LE<br>3b1a<br>532 | Reg.                  | Reg.<br>3b1a<br>532 | LE         | LE<br>3b1a<br>532 |
| $R_{eff}$ | 58.2                                                  | 65.6                | 70.0       | 68.4              | 59.2                  | 65.8                | 70.2       | 68.1              | 55.9                  | 64.8                | 70.3       | 69.2              | 55.3                  | 65.1                | 70.8       | 70.2              | 49.1                  | 67.6                | 70.9       | 72.1              |
| V         | 60.7                                                  | 68.3                | 71.7       | 71.8              | 61.2                  | 67.2                | 71.5       | 71.2              | 57.6                  | 67.5                | 71.3       | 72.5              | 56.7                  | 69.3                | 72.5       | 74.7              | 50.9                  | 72.1                | 71.1       | 77.5              |
| S         | 14.7                                                  | 21.8                | 14.4       | 17.8              | 14.9                  | 20.2                | 14.0       | 16.3              | 15.2                  | 21.1                | 14.9       | 17.7              | 12.5                  | 21.3                | 13.1       | 19.0              | 12.0                  | 22.1                | 11.5       | 20.5              |
| $m_r$     | 0.14                                                  | 0.15                | 0.11       | 0.11              | 0.14                  | 0.15                | 0.11       | 0.11              | 0.15                  | 0.15                | 0.11       | 0.11              | 0.15                  | 0.15                | 0.11       | 0.12              | 0.12                  | 0.23                | 0.12       | 0.22              |
| $m_i$     | 4E-3                                                  | 3E-3                | 3E-3       | 3E-3              | 4E-3                  | 3E-3                | 4E-3       | 3E-3              | 4E-3                  | 3E-3                | 4E-3       | 3E-3              | 5E-3                  | 4E-3                | 4E-3       | 4E-3              | 5E-3                  | 4E-3                | 4E-3       | 4E-3              |

Table 5: Comparison of microphysical inversions based on simulated lidar data. The values shown come from evaluation of the root-mean-square and fractional metrics that are defined in eqs. 1 and 2 in the text. Cases are separated into fine, mixture and coarse mode cases. Different retrieval schemes are tested as are varying amounts of random uncertainty in the input optical data.

| Color coding scheme used in Tables 4 and 5 |           |             |       |
|--------------------------------------------|-----------|-------------|-------|
|                                            | Green     | Yellow      | Red   |
| Effective Radius                           | 0-25%     | 25-40%      | >40%  |
| Volume Concentration                       | 0-20%     | 20-35%      | >35%  |
| Surface Area Concentration                 | 0-25%     | 25-40%      | >40%  |
| Real Part Refractive Index                 | 0.01-0.02 | 0.03-0.05   | >0.06 |
| Imaginary Part Refractive Index            | <0.002    | 0.003-0.009 | >0.01 |

Table 6. Color coding scheme used for Tables 4 and 5. Green indicates values fully consistent with the desired uncertainties expressed in the ACE draft report, yellow indicates marginal consistency, while red indicates uncertainties inconsistent with desired uncertainties.
